# Supplementary material for: Value of pyrazinamide for composition of new treatment regimens for multidrug-resistant Mycobacterium tuberculosis in China
Source: BMC Infect Dis. 2020 Jan 7;20:19. doi: 10.1186/s12879-020-4758-9 (PMC6947908; doi:10.1186/s12879-020-4758-9)
Supplement: Supplementary file 1 — Additional file 1: Table S1. Database for Univariable and multivariable analysis of risk factors for phenotypic and genotypic pyrazinamide resistance. [file 12879_2020_4758_MOESM1_ESM.xlsx]

## Sheet: Database
SupplementaryTable1. Database for Univariable and multivariable analysis of risk factors for phenotypic and genotypic pyrazinamide resistance
ID	Age_group	Residential area within China	Occupation	Residence in area according to start DOTS implementation	Number of previous anti-TB treatments	Previous pyrazinamide usage	Genotyping	Ofloxacin susceptibility result	Kanamycin susceptibility result	Pyrazinamide susceptibility result	pncA_wild or mutant	pncA_sequencing
1	2	1	1	1	1	1	1	1	0	0	0	Wild type
2	1	1	2	1	0	2	1	0	0	0	0	Wild type
3	2	1	1	1	1	1	1	0	0	0	0	Wild type
4	1	1	2	1	0	2	1	0	0	1	0	Wild type
5	2	1	2	1	0	2	3	0	0	1	0	Wild type
6	1	1	1	1	2	1	1	0	0	1	1	Gly162Val
7	1	1	2	1	0	2	2	0	0	0	0	Wild type
8	2	1	1	1	2	1	1	0	0	1	0	Wild type
9	1	1	1	1	1	1	1	0	0	0	0	Wild type
10	3	1	1	1	1	2	1	0	1	1	1	Cys138Trp
11	1	1	1	1	1	1	3	0	0	1	1	Thr76Pro
12	1	1	2	1	0	2	1	0	0	1	1	Val9Ala
13	2	1	1	1	0	2	1	0	0	0	0	Wild type
14	1	1	1	1	2	1	1	0	0	1	0	Wild type
15	2	1	1	1	0	2	2	0	0	0	0	Wild type
16	3	1	1	1	0	2	1	0	0	0	0	Wild type
17	3	1	1	1	0	2	1	0	1	0	0	Wild type
18	3	1	1	1	1	2	1	0	0	1	0	Wild type
19	3	1	2	1	1	2	3	0	0	0	1	Pro62Pro(synonymous)
20	3	1	1	1	0	2	3	0	0	0	0	Wild type
21	1	1	1	1	0	2	1	0	0	0	0	Wild type
22	3	1	1	1	0	2	3	1	1	0	0	Wild type
23	3	1	2	1	0	2	1	0	0	0	0	Wild type
24	3	1	1	1	0	2	1	0	0	0	0	Wild type
25	2	1	1	1	1	2	1	1	1	1	1	Thr76Pro
26	2	1	1	1	0	2	1	0	0	0	0	Wild type
27	3	1	1	1	0	2	1	0	0	0	0	Wild type
28	3	1	1	1	1	2	1	0	0	0	0	Wild type
29	2	2	1	0	0	2	2	1	1	0	0	Wild type
30	2	2	2	0	0	2	1	1	0	0	1	Gln10stop
31	1	2	2	0	0	2	1	1	0	1	1	Met1Thr
32	1	2	2	0	0	2	3	1	0	0	0	Wild type
33	1	2	1	0	1	1	1	1	0	0	1	Met1Thr
34	1	2	1	0	0	2	2	1	0	1	1	A(-11)G
35	1	2	2	0	1	2	1	1	0	1	1	Met1Thr
36	3	2	1	0	0	2	3	0	1	1	1	Thr142Met
37	1	2	2	0	1	2	1	1	1	0	1	Asp12Asn
38	2	2	1	0	0	2	2	1	0	1	0	Wild type
39	1	2	1	0	0	2	1	1	1	1	1	Asp12Asn
40	3	2	1	0	0	2	1	1	0	1	1	Met175Val
41	2	2	1	0	0	2	3	0	1	1	1	Phe94Ser
42	2	2	1	0	1	2	1	0	0	0	1	Met1Thr
43	2	2	2	0	1	2	1	1	1	0	1	Asp12Asn
44	1	2	1	0	1	1	1	0	0	0	0	Wild type
45	1	2	1	0	2	1	1	1	1	1	0	Wild type
46	2	2	1	0	1	1	3	0	0	1	0	Wild type
47	1	2	2	0	2	1	3	1	0	0	0	Wild type
48	2	2	2	0	0	2	1	0	0	0	0	Wild type
49	2	2	1	0	1	1	1	0	0	1	1	Ala161Gly
50	1	2	1	0	0	2	3	0	0	0	0	Wild type
51	1	2	2	0	2	1	1	1	0	1	1	Phe94Ser
52	2	2	2	0	4	1	1	1	1	1	1	Leu172Pro
53	2	2	2	0	2	1	1	0	0	0	0	Wild type
54	2	2	2	0	0	2	1	0	0	1	1	Thr142Ala
55	1	2	2	0	0	2	1	0	0	1	1	Thr142Ala
56	2	2	2	0	0	2	1	0	0	1	1	Gly17Ser
57	1	2	2	0	1	1	1	0	0	1	1	Thr76Pro
58	1	2	1	0	2	1	3	0	0	1	1	Gln10Pro
59	1	2	2	0	1	2	1	0	0	1	1	Ala102Pro
60	2	2	2	0	1	1	1	0	0	0	0	Wild type
61	2	2	1	0	0	2	2	0	0	0	0	Wild type
62	2	2	2	0	0	2	1	0	0	1	1	Ala146Thr
63	1	2	2	0	1	1	3	0	0	0	0	Wild type
64	2	2	2	0	0	2	1	0	0	1	0	Wild type
65	1	2	2	0	0	2	2	0	0	0	0	Wild type
66	1	2	2	0	0	2	3	1	0	1	1	Leu85Pro
67	2	2	2	0	2	2	1	0	0	1	1	Ala146Thr
68	2	2	2	0	1	1	1	0	0	1	0	Wild type
69	1	2	2	0	0	2	1	1	0	1	0	Wild type
70	2	2	2	0	1	2	1	1	0	1	1	Asp136Asn
71	1	2	2	0	2	1	3	1	0	1	1	Gln141Pro
72	2	1	2	1	1	1	3	0	0	0	0	Wild type
73	2	1	2	1	0	2	1	0	0	1	1	Asp63Tyr/Thr142Lys
74	3	1	1	1	2	1	1	1	0	0	0	Wild type
75	3	1	1	1	1	1	2	0	0	0	0	Wild type
76	3	1	2	1	2	1	1	0	0	0	0	Wild type
77	1	1	2	1	0	2	3	0	0	1	1	Leu116Arg
78	1	1	2	1	2	1	1	1	0	1	1	Lys96Arg
79	2	1	1	1	1	2	2	0	0	0	0	Wild type
80	2	2	1	0	2	1	1	0	0	0	0	Wild type
81	1	2	2	0	0	1	1	0	0	0	0	Wild type
82	1	2	1	0	2	1	1	0	1	0	0	Wild type
83	3	2	1	0	0	2	1	0	0	0	0	Wild type
84	2	2	1	0	2	2	2	0	0	0	0	Wild type
85	1	2	2	0	1	1	1	0	0	0	0	Wild type
86	2	2	2	0	1	2	1	0	0	0	0	Wild type
87	2	2	2	1	2	1	3	0	0	0	0	Wild type
88	2	2	2	1	2	1	3	0	0	1	1	Ile133Thr
89	2	2	2	1	2	1	3	0	0	0	0	Wild type
90	2	2	1	1	0	2	3	0	0	0	0	Wild type
91	2	2	1	1	0	2	1	0	0	0	0	Wild type
92	2	2	2	1	0	2	1	0	0	1	1	Val125Gly
93	1	2	1	1	1	1	3	0	0	0	0	Wild type
94	2	2	1	1	0	2	1	0	0	0	0	Wild type
95	1	2	2	1	2	1	3	0	0	1	1	Thr160Pro
96	1	2	1	1	0	2	1	1	1	0	0	Wild type
97	2	2	1	1	2	1	1	1	1	0	1	Val155Met
98	2	2	1	1	2	2	1	0	1	1	1	Frameshift
99	3	2	1	1	2	1	1	1	0	0	0	Wild type
100	2	2	2	1	2	1	2	0	0	0	0	Wild type
101	2	1	2	1	0	2	1	0	0	1	1	Frameshift
102	2	1	1	1	1	2	2	0	0	1	1	Gly17Asp
103	1	1	2	0	2	1	1	0	0	0	0	Wild type
104	3	1	1	0	2	1	1	0	0	0	0	Wild type
105	3	1	1	0	2	2	1	0	0	0	1	His137Arg
106	1	1	2	0	1	1	2	0	1	0	0	Wild type
107	1	1	2	0	2	1	1	0	1	1	0	Wild type
108	3	1	1	0	0	2	1	0	0	0	0	Wild type
109	2	1	1	0	0	2	3	0	0	0	0	Wild type
110	3	1	1	0	1	2	1	0	0	0	0	Wild type
111	1	1	1	0	0	2	1	0	0	1	1	Gln10Pro
112	1	1	2	0	1	1	1	0	0	1	1	Trp119Arg
113	3	1	1	0	2	1	2	0	0	0	0	Wild type
114	1	1	1	0	0	2	1	0	0	0	0	Wild type
115	1	1	1	0	1	2	1	0	1	0	0	Wild type
116	3	1	1	0	1	1	1	0	1	0	0	Wild type
117	1	1	2	0	1	1	2	0	0	0	0	Wild type
118	1	1	2	0	2	1	2	0	0	1	1	Glu174Gly
119	1	1	2	0	1	1	1	0	0	1	1	Tyr34Ser
120	2	1	2	0	1	1	2	0	0	1	0	Wild type
121	1	1	2	0	1	1	3	0	0	0	0	Wild type
122	1	1	2	0	2	1	3	0	0	0	0	Wild type
123	1	1	2	0	0	2	3	0	1	0	0	Wild type
124	1	1	1	0	2	2	1	0	0	1	1	Lys48Glu
125	2	1	2	0	2	1	2	1	0	1	1	Asp12Glu
126	2	2	1	0	1	1	1	0	0	0	0	Wild type
127	1	2	2	0	0	2	3	0	0	0	0	Wild type
128	3	2	1	0	0	2	1	0	0	0	0	Wild type
129	3	2	1	0	0	2	1	0	0	0	0	Wild type
130	2	2	1	0	1	2	3	0	0	1	1	Frameshift
131	2	2	1	0	1	2	1	1	0	1	1	Frameshift
132	3	2	1	0	2	1	1	0	0	1	1	Lys48Glu
133	2	2	1	0	1	1	1	0	0	0	0	Wild type
134	2	2	1	0	2	2	1	0	0	0	0	Wild type
135	1	2	2	0	0	2	1	0	0	0	0	Wild type
136	2	2	2	0	2	2	1	0	0	0	0	Wild type
137	2	2	2	0	1	1	1	1	1	1	1	Met175Val
138	2	2	2	0	0	2	1	0	1	1	1	Gly97Ser
139	3	2	1	0	1	2	1	0	0	0	0	Wild type
140	1	2	2	0	0	2	1	1	1	1	1	Asn149Val
141	1	2	2	0	0	2	1	0	0	1	1	Pro62Leu
142	2	2	2	0	0	2	1	0	0	0	0	Wild type
143	2	2	1	0	2	2	1	1	0	1	1	Val157Gly
144	2	2	1	0	2	2	1	0	0	0	1	Tyr103Ser
145	1	2	1	0	2	1	3	0	1	0	0	Wild type
146	1	2	1	0	0	2	1	0	1	0	0	Wild type
147	3	2	1	0	1	1	1	0	0	0	0	Wild type
148	2	2	1	0	1	1	1	0	0	1	0	Wild type
149	1	1	2	0	0	2	1	0	0	0	0	Wild type
150	1	1	2	0	1	1	1	0	0	1	1	Val139Leu
151	1	1	2	0	0	2	1	0	0	1	1	Thr100Pro
152	3	1	1	0	0	2	1	1	0	1	0	Wild type
153	2	1	2	0	1	1	1	1	0	1	1	Val139Leu
154	2	1	1	0	2	1	1	0	0	0	0	Wild type
155	2	1	1	0	2	1	1	1	0	1	1	Frameshift
156	1	1	2	0	2	1	3	0	0	1	1	Cys138Trp
157	1	1	1	0	0	2	3	0	0	0	0	Wild type
158	2	1	2	0	2	1	1	1	0	0	0	Wild type
159	2	1	1	0	2	1	2	1	0	0	0	Wild type
160	3	2	1	0	2	1	2	0	0	1	1	Frameshift
161	3	2	2	0	0	2	3	0	0	1	1	Met175Ile
162	1	2	1	0	0	2	1	0	0	0	0	Wild type
163	2	2	1	0	2	1	1	1	0	0	0	Wild type
164	2	2	1	0	0	2	1	0	0	0	0	Wild type
165	2	2	1	0	4	1	1	1	0	1	1	Gln141Pro
166	2	2	1	0	0	2	1	1	0	0	1	Ala171Val
167	2	2	1	0	0	2	1	1	1	1	1	Arg140Gly
168	1	2	1	0	0	2	1	1	1	1	1	His57Gln
169	3	2	1	0	0	2	1	1	0	1	1	Gln10Pro
170	3	2	1	0	1	2	1	0	0	0	0	Wild type
171	2	2	1	0	2	1	2	0	0	0	0	Wild type
172	3	2	1	0	1	1	1	0	0	0	0	Wild type
173	2	2	1	0	1	2	1	0	0	0	0	Wild type
174	2	2	1	0	2	2	1	0	0	1	1	Val44Gly
175	2	2	1	0	2	1	1	0	0	0	0	Wild type
176	3	2	1	0	0	2	3	0	0	0	0	Wild type
177	1	2	1	0	0	2	1	0	0	1	0	Wild type
178	1	2	2	0	1	1	3	1	0	0	0	Wild type
179	1	2	2	0	0	2	3	0	0	1	1	His71Pro
180	3	2	1	0	0	2	1	0	0	0	0	Wild type
181	3	2	1	0	2	2	3	1	0	0	0	Wild type
182	1	1	2	1	1	2	1	0	0	0	0	Wild type
183	2	1	2	1	1	1	1	0	0	0	0	Wild type
184	2	1	1	1	2	1	1	0	0	0	1	Thr47Ala
185	2	1	1	1	0	2	2	1	1	1	0	Wild type
186	1	1	1	1	1	1	1	1	1	0	0	Wild type
187	2	1	1	1	0	2	3	0	0	0	0	Wild type
188	1	1	1	1	1	1	1	0	0	1	0	Wild type
189	1	1	1	1	2	1	1	0	0	1	1	Asp136Gly
190	1	1	1	1	2	1	3	1	0	1	1	Thr47Ala
191	2	1	1	1	1	1	1	0	0	0	0	Wild type
192	3	1	2	1	1	1	1	0	0	0	0	Wild type
193	1	2	1	0	1	1	1	0	0	0	0	Wild type
194	1	2	1	0	0	2	1	0	0	0	0	Wild type
195	2	2	1	0	0	2	1	0	0	1	0	Wild type
196	2	2	1	0	1	2	1	0	0	0	0	Wild type
197	1	2	1	0	0	2	2	0	0	1	0	Wild type
198	3	2	1	0	1	1	1	0	0	0	0	Wild type
199	1	2	1	0	0	2	1	0	0	0	1	Cys14Gly
200	3	2	1	0	2	1	1	1	0	0	0	Wild type
201	2	2	1	0	0	2	1	0	0	0	0	Wild type
202	1	2	2	0	2	1	1	0	0	1	1	Val139Gly
203	1	2	2	0	0	2	2	0	0	0	0	Wild type
204	1	2	2	0	2	1	1	0	0	0	0	Wild type
205	1	2	1	0	1	1	1	1	1	1	1	Pro54Leu
206	1	2	2	0	0	2	1	0	1	1	1	Pro54Leu
207	1	2	1	0	0	2	2	0	0	0	1	Ser65Ser(synonymous)
208	2	2	1	0	2	1	1	1	0	1	0	Wild type
209	3	2	1	0	1	1	1	0	0	0	0	Wild type
210	3	2	1	0	2	1	1	0	0	0	0	Wild type
211	1	2	1	0	0	2	1	0	0	1	1	Lys48Glu
212	3	2	2	0	1	2	3	1	0	0	0	Wild type
213	1	2	1	0	1	1	1	0	0	0	1	Tyr103Cys
214	3	2	2	0	1	2	1	0	0	0	0	Wild type
215	3	2	1	0	1	1	1	0	0	0	0	Wild type
216	2	2	1	0	2	1	1	0	0	0	0	Wild type
217	2	2	2	1	2	2	1	0	0	1	1	Leu27Pro
218	2	2	1	1	1	1	1	0	0	0	0	Wild type
219	1	2	1	1	1	1	1	0	0	0	0	Wild type
220	3	2	1	1	1	1	2	0	0	1	0	Wild type
221	1	2	2	1	1	2	1	0	0	1	1	Leu27Pro
222	1	2	1	1	1	1	1	0	0	1	1	Ser164Pro
223	1	2	1	1	2	1	1	0	0	1	1	Frameshift
224	2	2	1	1	2	2	1	0	0	0	0	Wild type
225	2	2	1	1	2	1	1	0	0	0	0	Wild type
226	1	2	1	1	0	2	1	0	1	1	1	Lys96Thr
227	1	2	2	1	2	2	3	0	0	1	1	Frameshift
228	1	2	1	1	0	2	2	0	0	0	0	Wild type
229	3	2	2	1	1	1	2	0	0	0	0	Wild type
230	1	2	2	1	1	1	1	0	0	1	1	Leu85Pro
231	1	2	1	1	2	1	1	1	0	1	1	A(-11)G
232	3	2	1	1	4	1	2	0	0	0	0	Wild type
233	3	2	2	1	2	1	1	1	0	0	0	Wild type
234	1	2	2	1	2	1	1	0	0	0	0	Wild type
235	1	2	1	1	2	1	1	1	1	0	0	Wild type
236	1	2	2	1	1	1	3	0	0	0	0	Wild type
237	1	2	1	1	2	1	1	0	0	1	0	Wild type
238	1	2	2	1	2	2	1	0	0	1	0	Wild type
239	1	2	2	1	1	1	1	0	0	0	1	Tyr103Cys
240	1	2	2	1	1	1	1	0	0	0	0	Wild type
241	1	2	1	1	0	2	2	0	0	0	0	Wild type
242	2	2	1	1	0	2	1	0	0	0	0	Wild type
243	1	2	1	1	1	1	1	0	0	0	0	Wild type
244	2	2	2	1	2	1	1	1	0	0	0	Wild type
245	2	2	1	1	2	1	2	0	0	1	1	Ile5Ser
246	2	1	1	1	1	2	1	0	0	0	0	Wild type
247	2	1	1	1	1	1	1	0	0	0	0	Wild type
248	3	1	1	1	0	2	3	0	0	0	0	Wild type
249	2	1	2	1	0	2	1	0	0	0	1	Val130Ala
250	1	1	2	1	0	2	1	0	0	0	0	Wild type
251	2	1	1	1	1	1	1	0	0	0	0	Wild type
252	1	1	1	1	0	2	1	1	0	1	1	A(-11)G
253	1	1	1	1	0	2	1	0	0	0	0	Wild type
254	1	1	1	1	0	2	1	0	0	0	0	Wild type
255	3	1	1	1	1	1	2	0	0	1	0	Wild type
256	1	1	1	1	1	1	1	0	0	1	1	Leu182Ser
257	1	1	1	1	1	1	1	0	0	0	1	Val130Met
258	3	1	1	1	1	1	2	0	0	0	0	Wild type
259	3	1	1	1	0	2	1	0	0	1	1	Frameshift
260	2	1	1	1	1	1	1	0	0	0	0	Wild type
261	1	1	1	1	1	2	1	1	0	1	1	Cys14Tyr
262	1	1	1	0	1	2	1	0	0	0	1	Glu173Glu(nonsense)
263	1	1	1	0	1	2	1	0	0	0	0	Wild type
264	2	1	1	0	2	1	1	1	0	1	1	Asp12Ala
265	1	1	1	0	0	2	1	0	0	0	0	Wild type
266	1	1	2	1	1	1	3	0	0	0	1	Lys48Arg
267	1	3	1	1	0	2	1	1	0	0	1	Frameshift
268	1	3	2	1	0	2	1	1	1	1	0	Wild type
269	3	3	1	1	0	2	1	1	0	1	1	Gly132Asp
270	2	3	1	1	0	2	1	0	0	0	0	Wild type
271	1	3	2	1	0	2	1	0	0	0	0	Wild type
272	1	3	1	1	1	1	1	1	0	1	1	Frameshift
273	1	3	2	1	1	1	1	1	0	1	1	Gly132Asp
274	1	3	1	1	1	1	1	0	0	1	1	Gly132Asp
275	1	3	2	0	1	1	3	0	0	0	0	Wild type
276	1	3	1	0	1	1	2	1	0	1	1	His57Gln
277	1	3	2	0	1	1	3	0	0	0	0	Wild type
278	1	3	1	0	0	2	1	0	0	0	0	Wild type
279	2	3	1	0	0	2	1	0	0	0	0	Wild type
280	1	3	2	0	0	2	1	1	0	1	0	Wild type
281	3	3	1	0	0	2	3	1	0	0	1	Pro69Leu
282	1	3	2	0	0	2	3	0	1	1	0	Wild type
283	3	3	1	0	0	2	2	0	0	0	0	Wild type
284	2	3	1	0	0	2	1	1	0	1	1	Met175Ile
285	1	3	2	0	1	1	2	0	0	1	1	Gln122stop
286	2	3	1	0	0	2	1	0	0	0	1	Ala171Val
287	1	3	1	0	0	2	3	0	0	0	0	Wild type
288	1	3	2	0	0	2	3	0	0	1	0	Wild type
289	1	3	1	0	2	1	2	1	0	0	0	Wild type
290	2	3	1	0	1	2	1	0	0	1	0	Wild type
291	1	3	1	0	2	1	2	1	0	1	0	Wild type
292	1	3	1	0	2	1	1	1	0	1	1	Leu4Trp
293	2	3	1	0	2	1	3	1	1	0	0	Wild type
294	2	3	1	0	0	2	1	0	0	1	0	Wild type
295	1	3	2	1	1	1	1	0	0	0	0	Wild type
296	1	3	1	1	0	2	1	0	0	0	0	Wild type
297	2	3	2	0	0	2	1	0	0	0	0	Wild type
298	1	3	1	0	2	1	1	1	1	1	1	Thr100Pro
299	1	3	2	0	1	1	1	0	0	0	0	Wild type
300	3	3	1	0	0	2	3	1	0	1	1	Gln10Pro
301	1	3	2	0	1	1	1	0	0	1	1	Arg154Trp
302	1	3	2	0	2	1	1	0	0	0	0	Wild type
303	1	3	2	0	2	1	1	0	0	0	0	Wild type
304	1	3	1	0	1	1	1	1	0	1	1	Frameshift
305	1	3	2	1	0	2	1	0	0	0	0	Wild type
306	1	3	2	1	4	2	2	1	0	0	0	Wild type
307	1	3	1	1	0	2	1	0	0	0	0	Wild type
308	1	3	1	1	0	2	1	0	0	0	0	Wild type
309	1	3	2	0	0	2	1	0	0	0	0	Wild type
310	1	3	1	0	0	2	2	0	1	0	0	Wild type
311	1	3	1	1	0	2	1	0	1	0	0	Wild type
312	2	3	2	1	1	2	1	0	1	1	0	Wild type
313	1	3	1	1	0	2	1	0	1	1	1	Lys96Met
314	1	3	1	1	0	2	1	0	0	0	0	Wild type
315	3	3	1	1	1	1	1	0	0	0	0	Wild type
316	3	3	1	1	0	2	1	1	0	0	0	Wild type
317	1	3	1	1	0	2	1	0	0	0	0	Wild type
318	3	3	1	1	0	2	1	1	0	1	0	Wild type
319	2	3	1	1	0	2	1	1	0	1	0	Wild type
320	3	3	1	1	1	2	1	1	0	1	1	His137Arg
321	1	3	2	1	0	2	1	1	0	1	1	Trp68Gly
322	1	3	1	1	1	1	1	0	0	0	0	Wild type
323	3	3	1		2	1	2	0	0	0	1	Ser66Leu
324	1	3	1	1	0	2	2	0	0	0	0	Wild type
Note:
Age_group:	1=＜40 year; 2=40-59 year; 3=≧60 year
Residential area within China:	1=East; 2=Central; 3=West
Occupation:	1=Farmer; 2=Non-farmer
Residence in area according to start DOTS implementation	0=In 2000 or later; 1= Before 2000
Number of previous anti-TB treatments	0=No; 1=One prior course of treatment; 2=More than one prior course of treatment
Previous pyrazinamide usage	1=Yes; 2=No
Genotyping	1=Beijing; 2=Nonbeijing; 3=No data
Ofloxacin susceptibility result	0=Susceptible; 1=Resistant
Kanamycin susceptibility result	0=Susceptible; 1=Resistant
Pyrazinamide susceptibility result	0=Susceptible; 1=Resistant
pncA_wild or mutant	0=Wild type; 1=Mutations or Deletions/ Insertions
